# Supplementary material
Source: publisher figshare collection journal article supplement (https://acs.figshare.com/ndownloader/files/4502395)
Supplement: Supplementary file 1 [file 4502395]

[Supporting Information]

**Syntheses, Structures, and Magnetic Properties of Tetramanganese(III) and Hexamanganese(III) Complexes Containing Derivative of Biguanidate Ligand: Ferromagnetic Interaction via Imino Nitrogen**

Asako Igashira-Kamiyama,<sup>\*,†</sup> Takashi Kajiware,<sup>\*,‡§</sup> Motohiro Nakano,<sup>||</sup> Takumi Konno,<sup>†</sup> and Tasuku Ito<sup>§</sup>

<sup>†</sup> Department of Chemistry, Graduate School of Science, Osaka University, Japan

<sup>‡</sup> Department of Chemistry, Faculty of Science, Nara Women's University, Japan

<sup>§</sup> Department of Chemistry, Graduate School of Science, Tohoku University, Japan

<sup>||</sup> Department of Applied Chemistry, Graduate School of Engineering, Osaka University, Japan

igashira@chem.sci.osaka-u.ac.jp; kajiware@cc.nara-wu.ac.jp

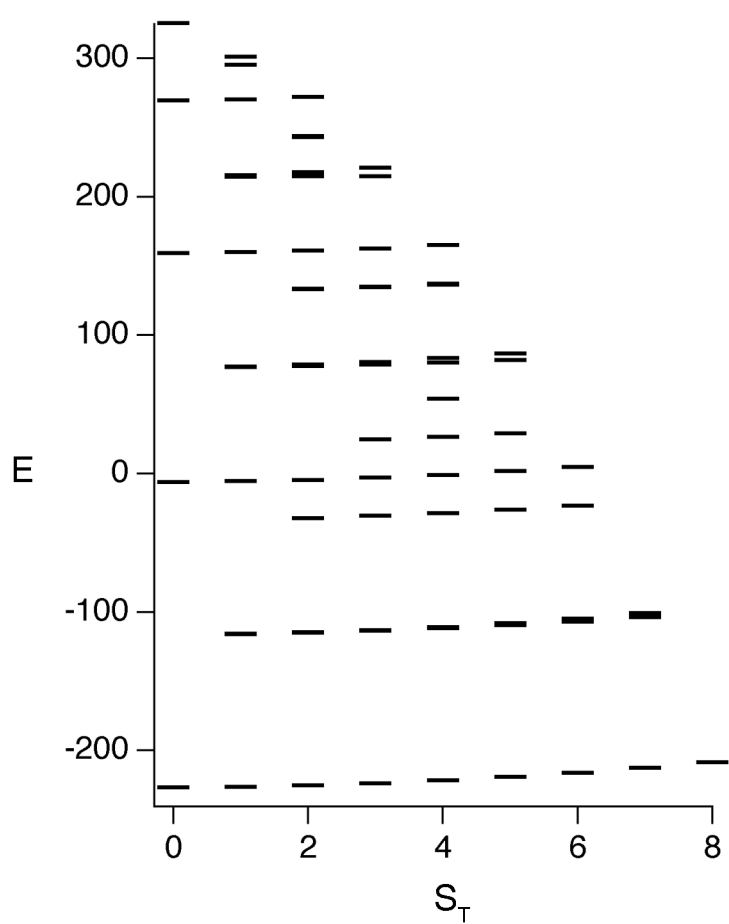

**Figure S1.** Energy level diagram for **1**.

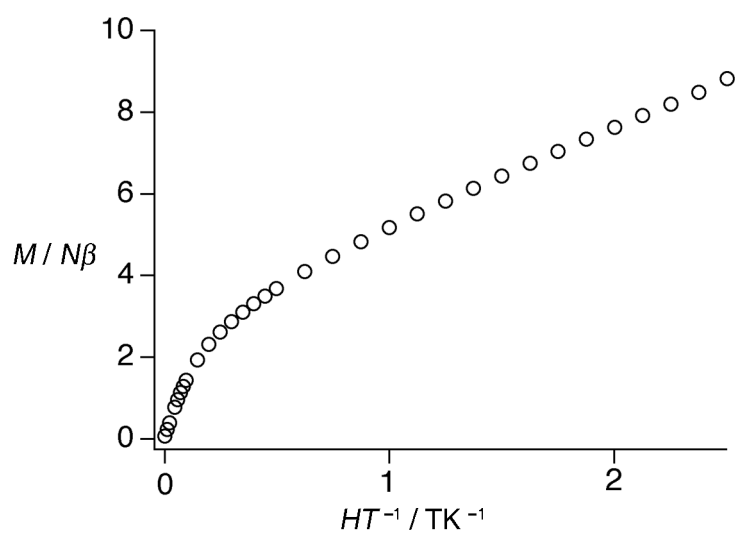

**Figure S2.** Field dependent magnetization for **1** at 2 K.

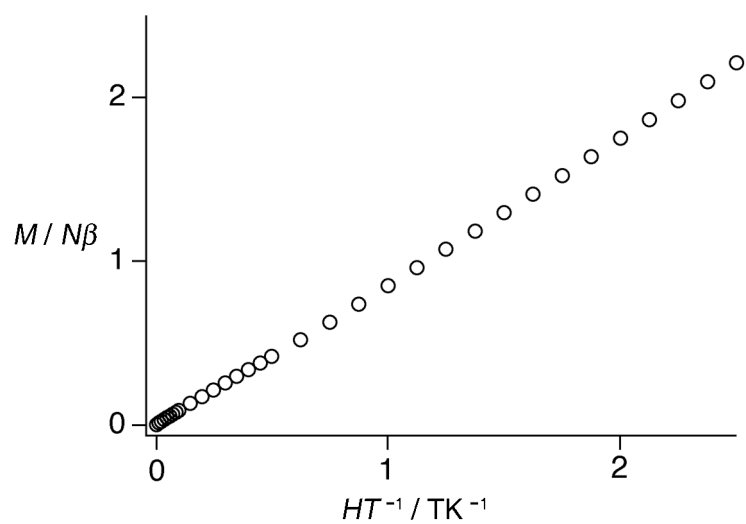

**Figure S3.** Field dependent magnetization for **2** at 2 K.
